# Supplementary material
Source: publisher figshare collection journal article supplement (https://acs.figshare.com/ndownloader/files/4008490)
Supplement: Supplementary file 1 [file 4008490]

## Supporting Information

### Online HPLC-NMR: An efficient method for the analysis of PMMA with respect to tacticity

Mathias Hehn, Khumo Maiko, Harald Pasch, Wolf Hiller

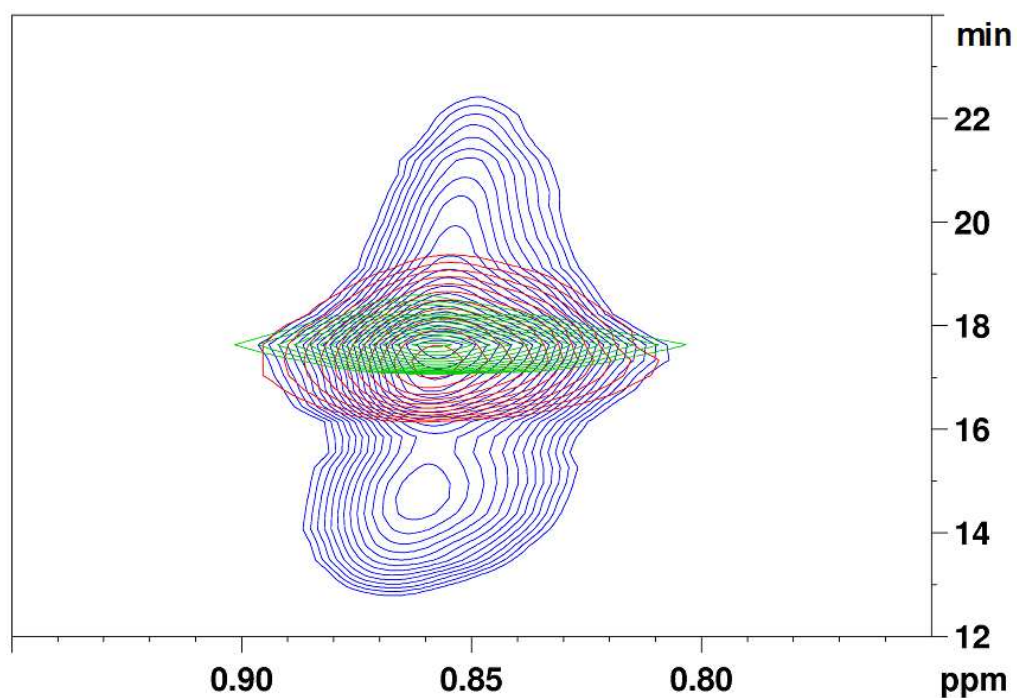

**Figure S1.** Overlaid HPLC-NMR contour plots of the syndiotactic  $\alpha$ -CH<sub>3</sub> signals of blend 1 (blue), sample HS2 (red) and sample HS6 (green), measured with gradient A.

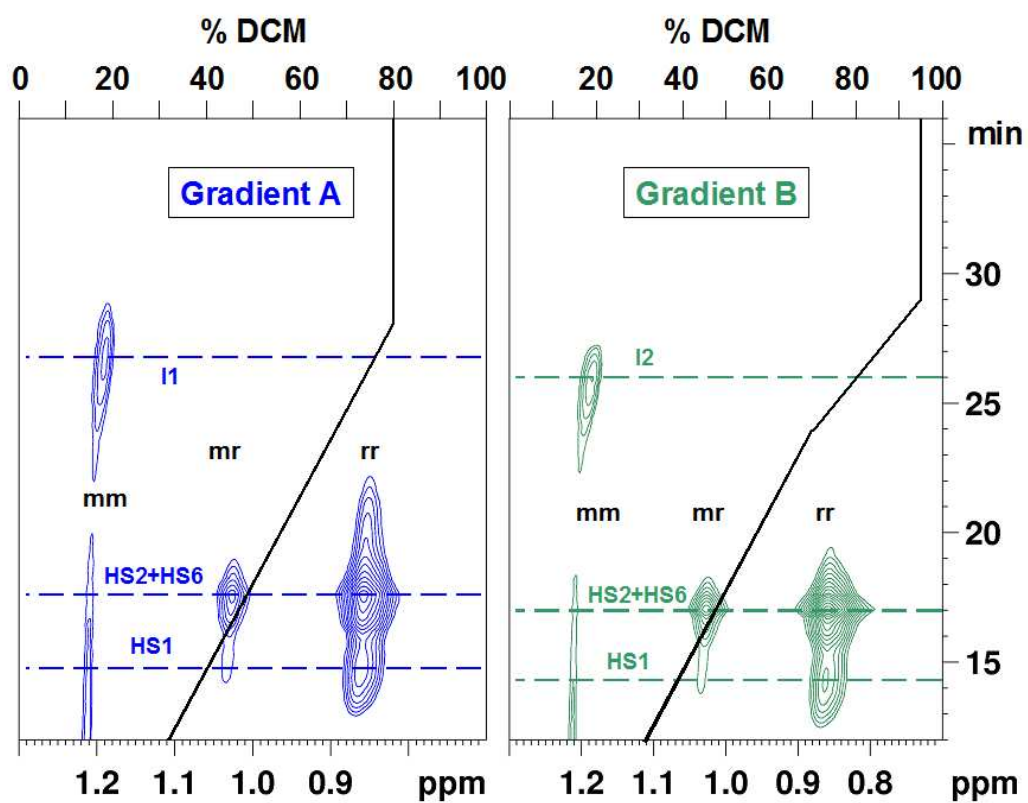

**Figure S2.** HPLC-NMR measurements of blend 1 performed with gradients A (left) and B (right); black solid lines: DCM content with respect to the effective gradient.

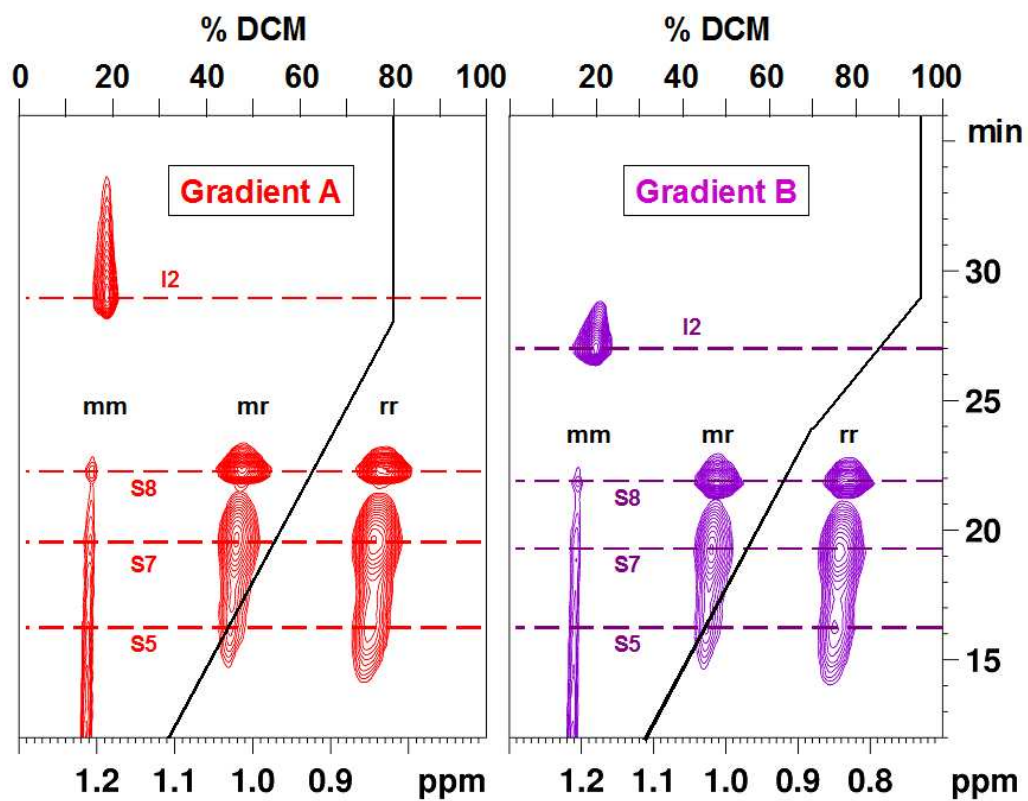

**Figure S3.** HPLC-NMR measurements of blend 2 performed with gradients A (left) and B (right); black solid lines: DCM content with respect to the effective gradient.

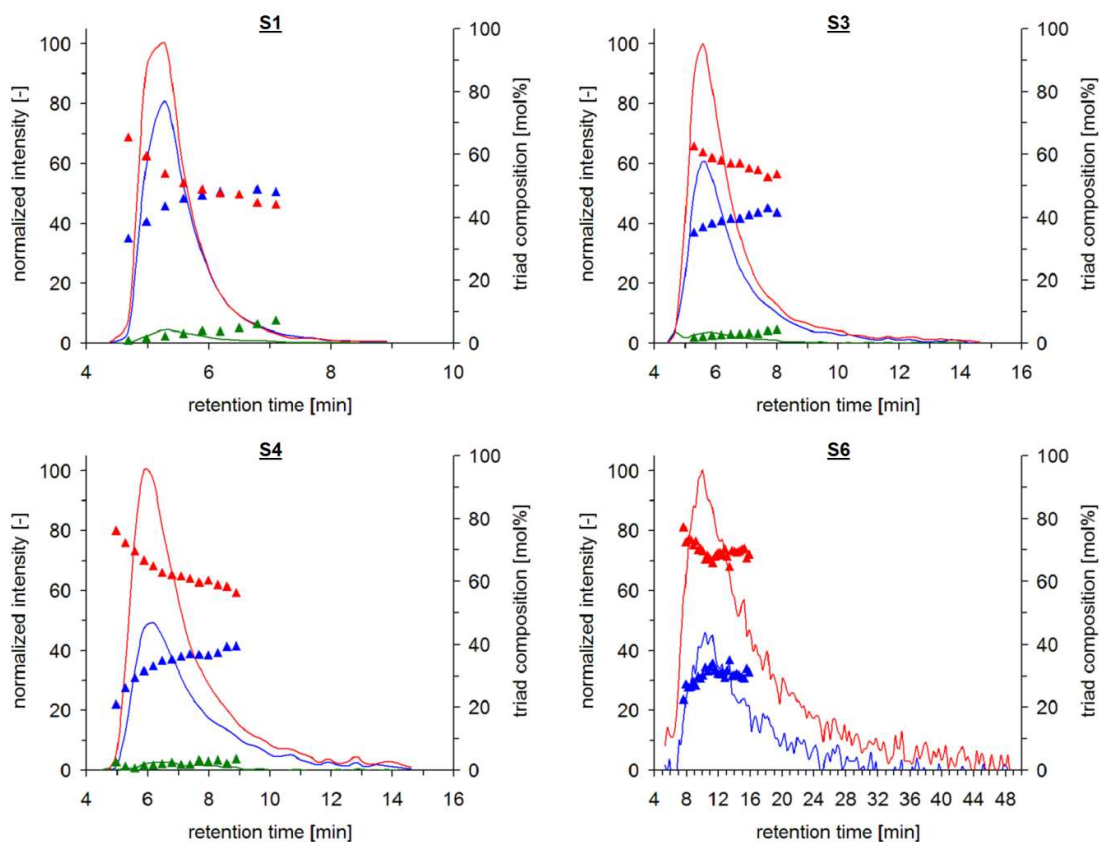

**Figure S4.** Isocratic HPLC-NMR chromatograms of samples S1, S3, S4 and S6 at a solvent composition of 60% acetone and 40% DCM; solid lines: chromatograms of  $\alpha$ -CH<sub>3</sub> signals, triangles = change in triad composition; red = rr triad, blue = mr triad, green = mm triad (mm not observable in S6 because of too low signal-to-noise-levels).

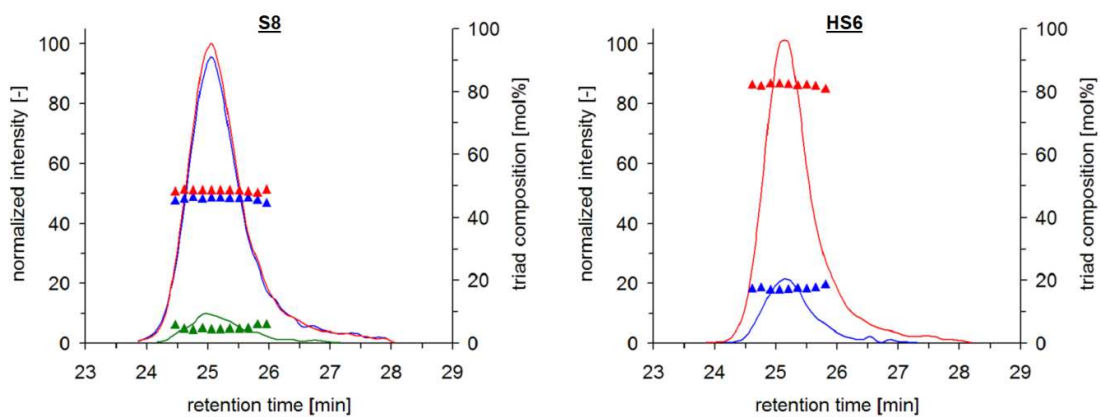

**Figure S5.** SEC-NMR chromatograms of samples S8 and HS6; solid lines: chromatograms of  $\alpha$ -CH<sub>3</sub> signals, triangles = change in triad composition; red = rr triad, blue = mr triad, green = mm triad (mm in HS6 is not evaluated because of too low signal-to-noise-level).

**Table S1.** Average microstructures of the samples measured by SEC-NMR (calculated over the total elution times).

| Sample | Tacticity [mol%] |      |      | Sample | Tacticity [mol%] |      |      |
|--------|------------------|------|------|--------|------------------|------|------|
|        | mm               | mr   | rr   |        | mm               | mr   | rr   |
| S5     | 5.0              | 37.6 | 57.4 | HS2    | 2.4              | 21.3 | 76.3 |
| S7     | 2.8              | 36.6 | 60.6 | HS6    | 0.7              | 17.1 | 82.2 |
| S8     | 5.0              | 46.6 | 48.4 | I1     | 93.6             | -    | 6.4  |
| HS1    | 1.5              | 25.5 | 73.0 | I2     | 98.3             | -    | 1.7  |
